# Supplementary material for: Lattice distortion of crystalline-amorphous nickel molybdenum sulfide nanosheets for high-efficiency overall water splitting: libraries of lone pairs of electrons and in situ surface reconstitution
Source: Royal Society of Chemistry journal article supplement (doi:10.1039/d1nr07438e), 2021-12-17
Supplement: d1nr07438e1.pdf [file d1nr07438e1.pdf]

## Supporting Information

# Lattice Distortion of Crystalline-amorphous nickel molybdenum sulfide nanosheets for high-efficiency overall water splitting: long pair electrons' libraries and in-suit surface reconstitution

*Zhikai Shi<sup>a</sup>, Zebin Yu<sup>\*a</sup>, Juan Guo<sup>b</sup>, Ronghua Jiang<sup>c</sup>, Yanping Hou<sup>a</sup>, Yushan Chen<sup>a</sup>, Honglei Chen<sup>a</sup>, Mi Wang<sup>a</sup>, Han Pang<sup>a</sup>, Wenjun Tang<sup>a</sup>*

<sup>a</sup> MOE Key Laboratory of New Processing Technology for Non-ferrous Metals and Materials, Guangxi Key Laboratory of Processing for Non-ferrous Metals and Featured Materials, School of Resources, Environment & Materials, Guangxi University, Nanning 530004, P. R. China.

<sup>b</sup> School of Life Sciences, Wuhan University, Wuhan, 430072, P. R. China.

<sup>c</sup> School of Chemical and Environmental Engineering, Shaoguan University, Shaoguan 512005, P. R. China.

Corresponding Authors:

\* E-mail: xxzx7514@hotmail.com, yuzebin@gxu.edu.cn (Z Yu).

Tel: +8613877108420.

# Content

## Physical characterization

## Electrochemical measurements

## Density functional theory (DFT) calculations

## In-situ Raman experiments

**Fig. S1.** (a) N<sub>2</sub> adsorption/desorption isotherms of Ni<sub>3</sub>S<sub>2</sub>/NF, NiMoS<sub>4</sub>-6/NF, NiMoS<sub>4</sub>-12/NF, NiMoS<sub>4</sub>-18/NF, and NiMoS<sub>4</sub>-24/NF, respectively. (b) The pore size distribution of Ni<sub>3</sub>S<sub>2</sub>/NF, NiMoS<sub>4</sub>-6/NF, NiMoS<sub>4</sub>-12/NF, NiMoS<sub>4</sub>-18/NF, and NiMoS<sub>4</sub>-24/NF, respectively.

**Fig. S2.** (a) TEM images of Ni<sub>3</sub>S<sub>2</sub>. (b) Strain map of Ni<sub>3</sub>S<sub>2</sub>. FFT images of (inset of a) Ni<sub>3</sub>S<sub>2</sub>. (c) TEM-EDX elemental mapping of Ni<sub>3</sub>S<sub>2</sub>.

**Fig. S3.** CV curves of (a) NF, (b) Ni<sub>3</sub>S<sub>2</sub>/NF, (c) NiMoS<sub>4</sub>-6/NF, (d) NiMoS<sub>4</sub>-12/NF, (e) NiMoS<sub>4</sub>-18/NF, and (f) NiMoS<sub>4</sub>-24/NF at increasing scan rates from 20 mV s<sup>-1</sup> to 100 mV s<sup>-1</sup>.

**Fig. S4.** Plots used for evaluating the ECSA of NF, Ni<sub>3</sub>S<sub>2</sub>/NF, NiMoS<sub>4</sub>-6/NF, NiMoS<sub>4</sub>-12/NF, NiMoS<sub>4</sub>-18/NF, and NiMoS<sub>4</sub>-24/NF as a function of scan rate.

**Fig. S5.** (a) XRD patterns of NiMoS<sub>4</sub>-12/NF before and after the stability test for HER. (b) XRD patterns of NiMoS<sub>4</sub>-12/NF before and after the stability test for OER. (c)

Raman spectra of NiMoS<sub>4</sub>-12/NF before and after the stability test for HER. (d) Raman spectra of NiMoS<sub>4</sub>-12/NF before and after the stability test for OER. (e) EPR spectra of NiMoS<sub>4</sub>-12/NF before and after the stability test for HER and OER. (f) PL spectra of NiMoS<sub>4</sub>-12/NF before and after the stability test for HER and OER.

**Fig. S6.** SEM images of NiMoS<sub>4</sub>-12/NF after the stability test for HER.

**Fig. S7.** SEM images of NiMoS<sub>4</sub>-12/NF after the stability test for OER.

**Fig. S8.** (a) TEM images of NiMoS<sub>4</sub>-12. (b) Strain map of NiMoS<sub>4</sub>-12. FFT images of (inset of a) NiMoS<sub>4</sub>-12. (c) TEM-EDX elemental mapping of NiMoS<sub>4</sub>-12 after the stability test for HER.

**Fig. S9.** (a) TEM images of NiMoS<sub>4</sub>-12. (b) Strain map of NiMoS<sub>4</sub>-12. FFT images of (inset of a) NiMoS<sub>4</sub>-12. (c) TEM-EDX elemental mapping of NiMoS<sub>4</sub>-12 after the stability test for OER.

**Fig. S10.** HR-XPS spectra of (a) Ni 2p, (b) Mo 3d, and (c) S 2p of NiMoS<sub>4</sub>-12/NF before and after the stability test for HER and OER. (c) HR-XPS spectra of O1s of NiMoS<sub>4</sub>-12/NF before and after the stability test for OER.

**Fig. S11.** The  $\Delta GH^*$  of NiMoS<sub>4</sub>, NiMoS<sub>4</sub>-Sv, and NiMoS<sub>4</sub>-Sv-1 on the (104) face. The Ni, Mo, S, and H atoms are represented by Green, blue, yellow, and white spheres, respectively.

**Fig. S12.** A simplified diagram the in-situ Raman for NiMoS<sub>4</sub>-12/NF (from OCP to 1.924 V vs. RHE).

**Fig. S13.** DFT simulation calculation Raman frequency of the bending and stretching vibration modes of Ni-O belonging to Ni-OOH.

**Fig. S14.** Structures of the reaction intermediates through the OER process on NiMoS<sub>4</sub>-Sv-1 surfaces.

**Fig. S15.** Structures of the reaction intermediates through the OER process on Ni-OOH surfaces.

**Table S1.** Comparison of the element mass percentage and atomic percentage for Ni<sub>3</sub>S<sub>2</sub>, NiMoS<sub>4</sub>-12, NiMoS<sub>4</sub>-12 (HER for 100h), and NiMoS<sub>4</sub>-12 (OER for 100h) from the TME-EDS.

**Table S2.** Comparison of electrochemical performances of HER, OER, and OWS of NiMoS<sub>4</sub>-12 with recently reported top tier metal based inorganic electrocatalysts in 1 M KOH.

## Physical characterization

The crystalline phases of various electrodes were analyzed by X-ray diffraction (XRD) using a diffractometer (DX-2700A, Dandong, China) with Cu K $\alpha$  radiation and an accelerating voltage of 40 kV in the  $2\theta$  range of 10–90°, at a scanning rate of 15° min<sup>-1</sup>. Raman spectra were recorded via a Raman spectrometer (inVia Reflex, Renishaw, England) with 532 nm excitation to explore the molecular vibration and rotation information on the electrode surface. Electron paramagnetic resonance (EPR) spectra were collected at 298 K over an electron paramagnetic resonance spectrometer (Bruker A300, Bruker, German) to measure defect species. Photoluminescence (PL) spectra was obtained via a steady-state fluorescence spectrum analyzer (OmniFluo-960, ZOLIX, China) with an excitation wavelength of 532 nm.

The electrode surface morphologies were characterized by a field-emission scanning electron microscopy (FESEM, Hitachi SU8020, Japan). High-resolution transmission electron microscopy (HR-TEM) was carried out to characterize the inner structures of the catalysts using a FEI TECNAI G2 F30 instrument from USA at 300 kV, and the elemental compositions of the electrodes were investigated by an energy-dispersive X-ray spectroscopy (EDS). The electrode samples were ultrasonically dispersed in ethanol, and the testing samples were prepared by dropping the dispersed suspensions onto the carbon film-coated copper meshes.

X-ray photoelectron spectroscopy (XPS) was performed to gain insight into the chemical composition and binding states of the electrodes on a Thermo Scientific K-Alpha (USA) instrument with a monochromatic Al Ka X-ray source.

Nitrogen adsorption-desorption isotherms were applied to examine the specific surface areas and the pore size distribution via the Brunauer–Emmett–Teller (BET; ASAP2460, America) and Barrett–Joyner–Halenda (BJH) methods at 57.3 K.

### **Electrochemical measurements**

All electrochemical measurements were conducted using an electrochemical workstation (CHI 660E, China) using a typical three-electrode system in a quartz electrolytic cell, with the prepared catalyst materials as the working electrode, a graphite rod electrode as the counter electrode, a Hg|HgO|OH<sup>-</sup> electrode as the reference electrode, and the 1 M KOH solution as the electrolyte at room temperature. Before the electrochemical tests, the electrolyte was purged with N<sub>2</sub> for 30 min to remove O<sub>2</sub>. The potential values in this study were converted and referred to the reversible hydrogen electrode (RHE) using the Nernst equation,  $E(\text{RHE}) = E(\text{vs. Hg|HgO|OH}^-) + 0.059 \cdot \text{pH} + 0.098 \text{ V} = E(\text{vs. Hg|HgO|OH}^-) + 0.924 \text{ V}$ . The overpotential ( $\eta$ ) was calculated by using the equation:  $\eta = E(\text{RHE}) - 1.23 \text{ V}$  for the OER. Linear sweep voltammetry (LSV) polarization curves for the HER and OER were conducted at a scan rate of 5 mV s<sup>-1</sup> with 95% iR compensation. The durability was tested at current densities of 100 mA cm<sup>-2</sup> for 100 h for the HER and OER. Electrochemical impedance spectroscopy (EIS) was performed within the frequency range of 100 kHz to 0.01 Hz with an AC potential

amplitude of 5 mV at open circuit voltage for the HER and OER. The electrochemically active surface areas (ECSAs) of the electrodes were characterized by conducting cyclic voltammetry (CV) with various scan rates of 20, 40, 60, 80, and 100 mV s<sup>-1</sup> in the non-Faradiac region within the potential range from 0.124 V to 0.324 V (vs. RHE). The ECSAs value is equal to the ratio of the dual-layer capacitances (C<sub>dl</sub>) of the substance to the normally accepted reference specific capacitance (C<sub>s</sub>= 0.040 mF cm<sup>-2</sup>).

### **Density functional theory (DFT) calculations**

The density of states of NiMoS<sub>4</sub>, NiMoS<sub>4</sub>-Sv, and NiMoS<sub>4</sub>-Sv-1 were studied using the electronic structure obtained from the periodic DFT calculations performed through the CASTEP code. Generalized gradient approximation (GGA) for the exchange-correlation using Perdew, Burke and Emzerhof (PBE) was employed to examine the electronic structure for all the above structure. For this simulation, the Quality, the Energy cutoff and the k-point were set as fine, 421.80 eV and (4×4×4 Å<sup>-1</sup>), respectively.

### **In-situ Raman experiments**

A specially made Teflon based electrochemical cell was used for the combined electrochemical and in situ Raman spectroscopy study. This cell contains a Pt wire and a Hg|HgO|OH<sup>-</sup> electrode, served as a counter electrode and reference electrode, respectively. The NiMoS<sub>4</sub>-12/NF electrode was used as a working electrode. In situ Raman spectra of the sample electrodes were recorded using a confocal Raman microscope (Hitachi High-tech SU8020). The laser beam (532 nm, green) was focused

through a microscope objective ( $\times 50$ ) onto a circular area of 1 mm in diameter on the NiMoS<sub>4</sub>-12/NF electrode and the backscattered light was collected through the same objective. The in-situ Raman experiments were conducted to exploring electrode surface changes at an increasing applied voltage from 1.524 to 1.924 V vs. RHE in 1 M KOH by using green (532 nm) excitation laser lines.



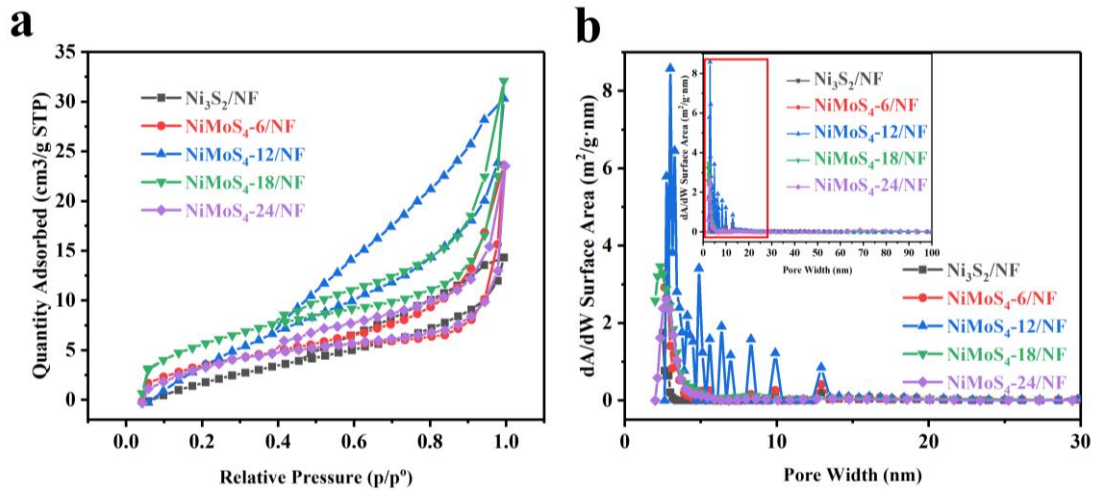

**Fig. S1.** (a)  $N_2$  adsorption/desorption isotherms of  $Ni_3S_2/NF$ ,  $NiMoS_4-6/NF$ ,  $NiMoS_4-12/NF$ ,  $NiMoS_4-18/NF$ , and  $NiMoS_4-24/NF$ , respectively. (b) The pore size distribution of  $Ni_3S_2/NF$ ,  $NiMoS_4-6/NF$ ,  $NiMoS_4-12/NF$ ,  $NiMoS_4-18/NF$ , and  $NiMoS_4-24/NF$ , respectively.

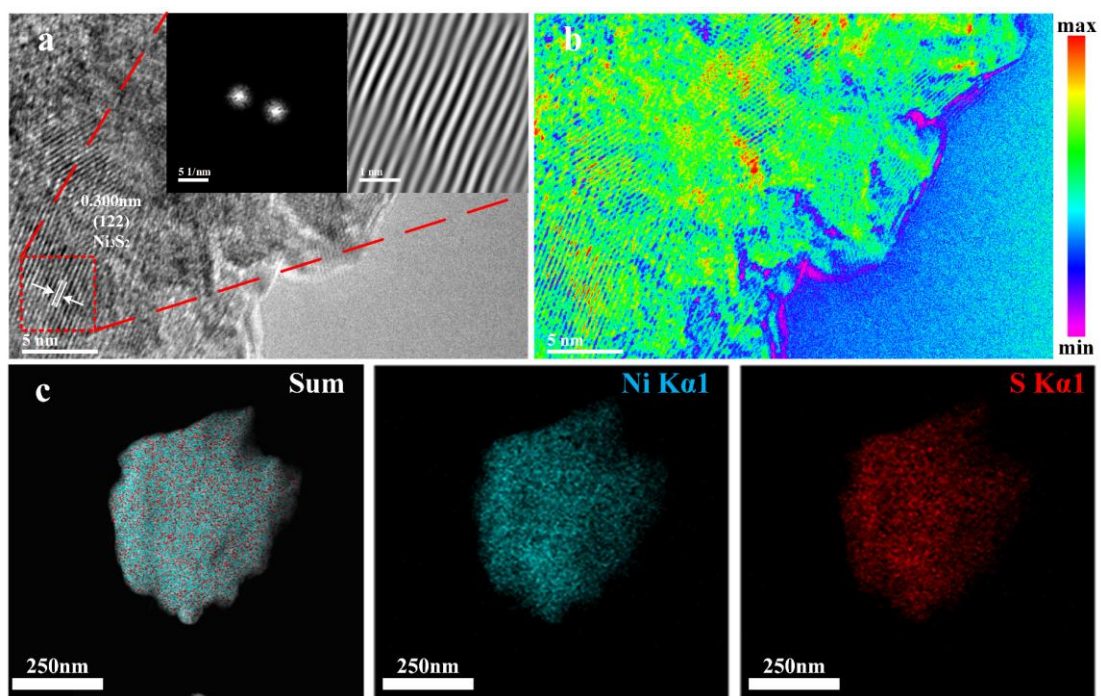

**Fig. S2.** (a) TEM images of  $\text{Ni}_3\text{S}_2$ . (b) Strain map of  $\text{Ni}_3\text{S}_2$ . FFT images of (inset of a)  $\text{Ni}_3\text{S}_2$ . (c) TEM-EDX elemental mapping of  $\text{Ni}_3\text{S}_2$ .

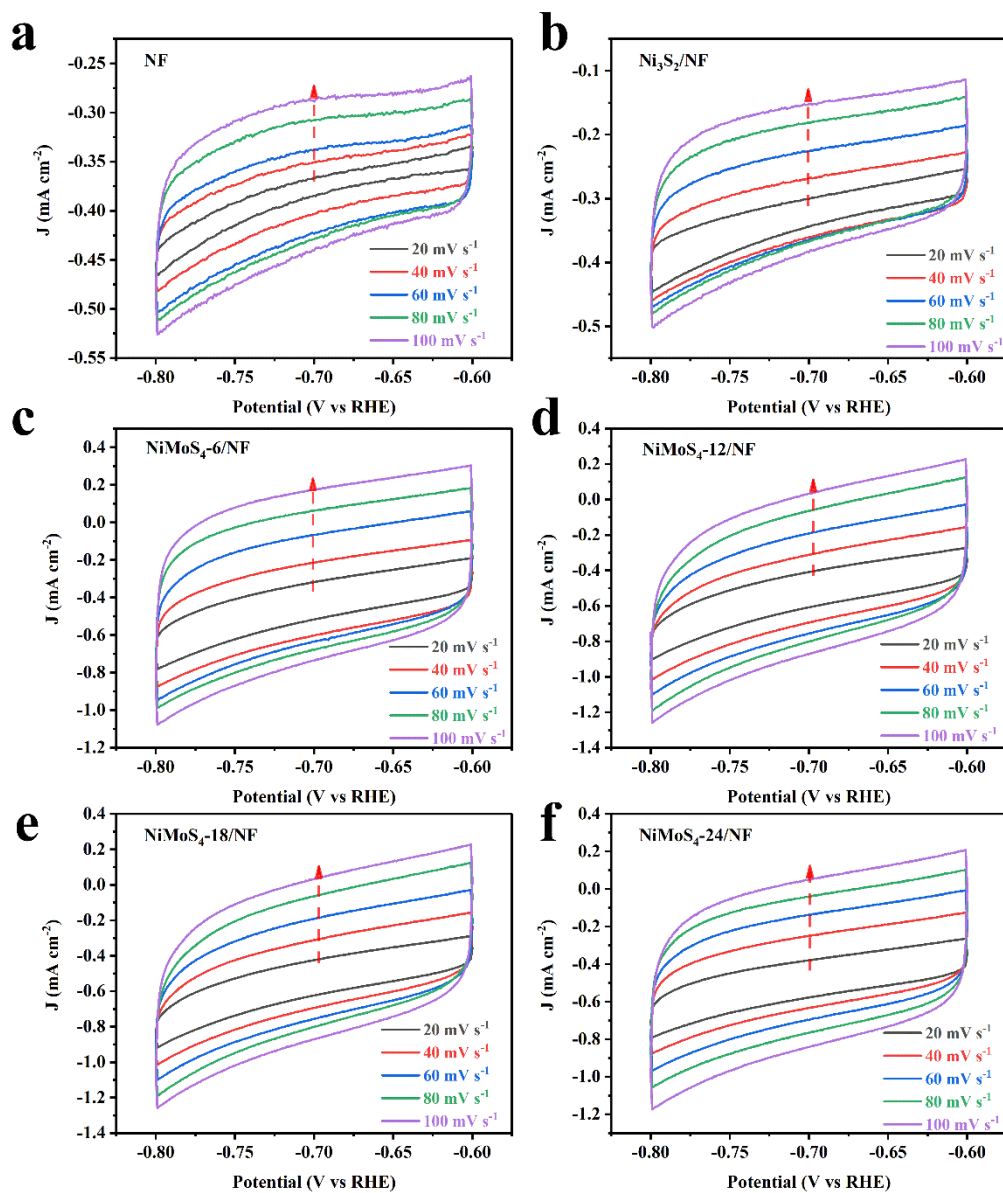

**Fig. S3.** CV curves of (a) NF, (b)  $\text{Ni}_3\text{S}_2/\text{NF}$ , (c)  $\text{NiMoS}_4\text{-6}/\text{NF}$ , (d)  $\text{NiMoS}_4\text{-12}/\text{NF}$ , (e)  $\text{NiMoS}_4\text{-18}/\text{NF}$ , and (f)  $\text{NiMoS}_4\text{-24}/\text{NF}$  at increasing scan rates from  $20 \text{ mV s}^{-1}$  to  $100 \text{ mV s}^{-1}$ .

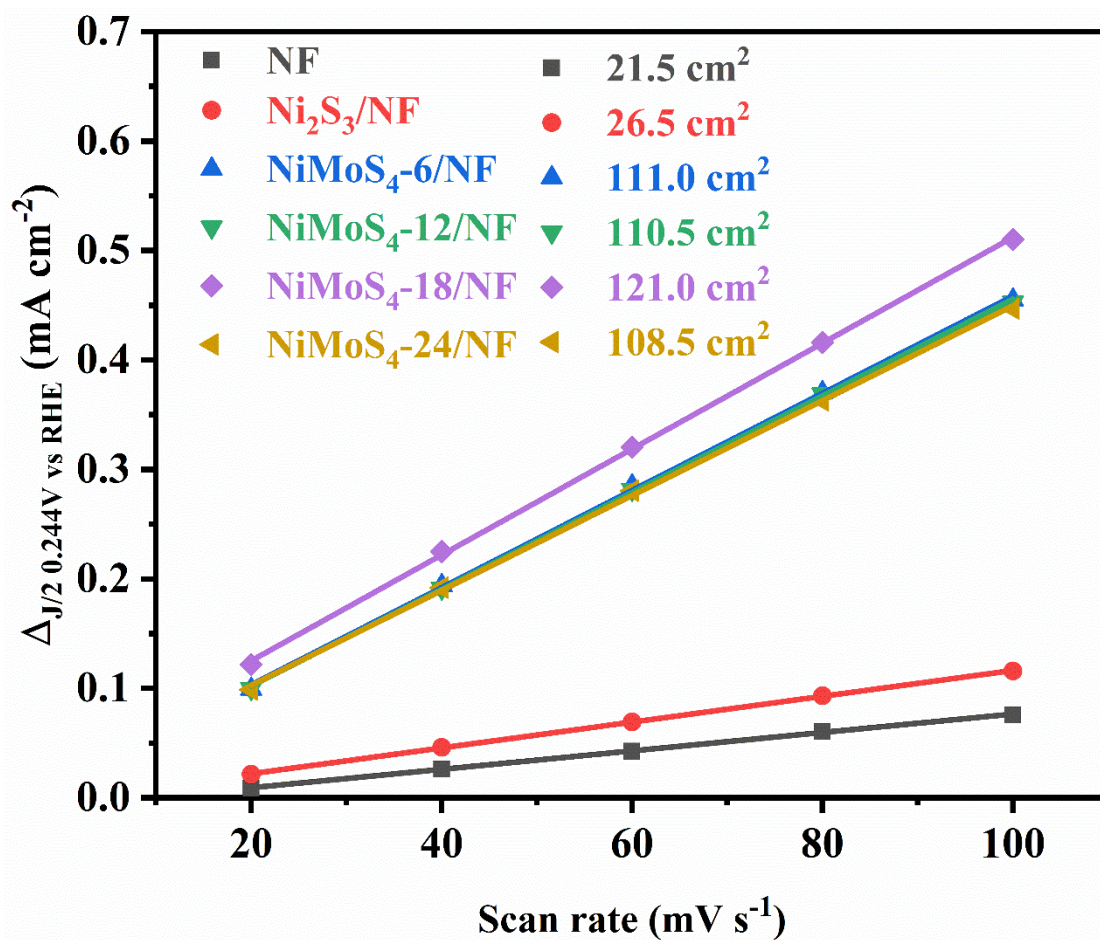

**Fig. S4.** Plots used for evaluating the ECSA of NF, Ni<sub>3</sub>S<sub>2</sub>/NF, NiMoS<sub>4</sub>-6/NF, NiMoS<sub>4</sub>-12/NF, NiMoS<sub>4</sub>-18/NF, and NiMoS<sub>4</sub>-24/NF as a function of scan rate.

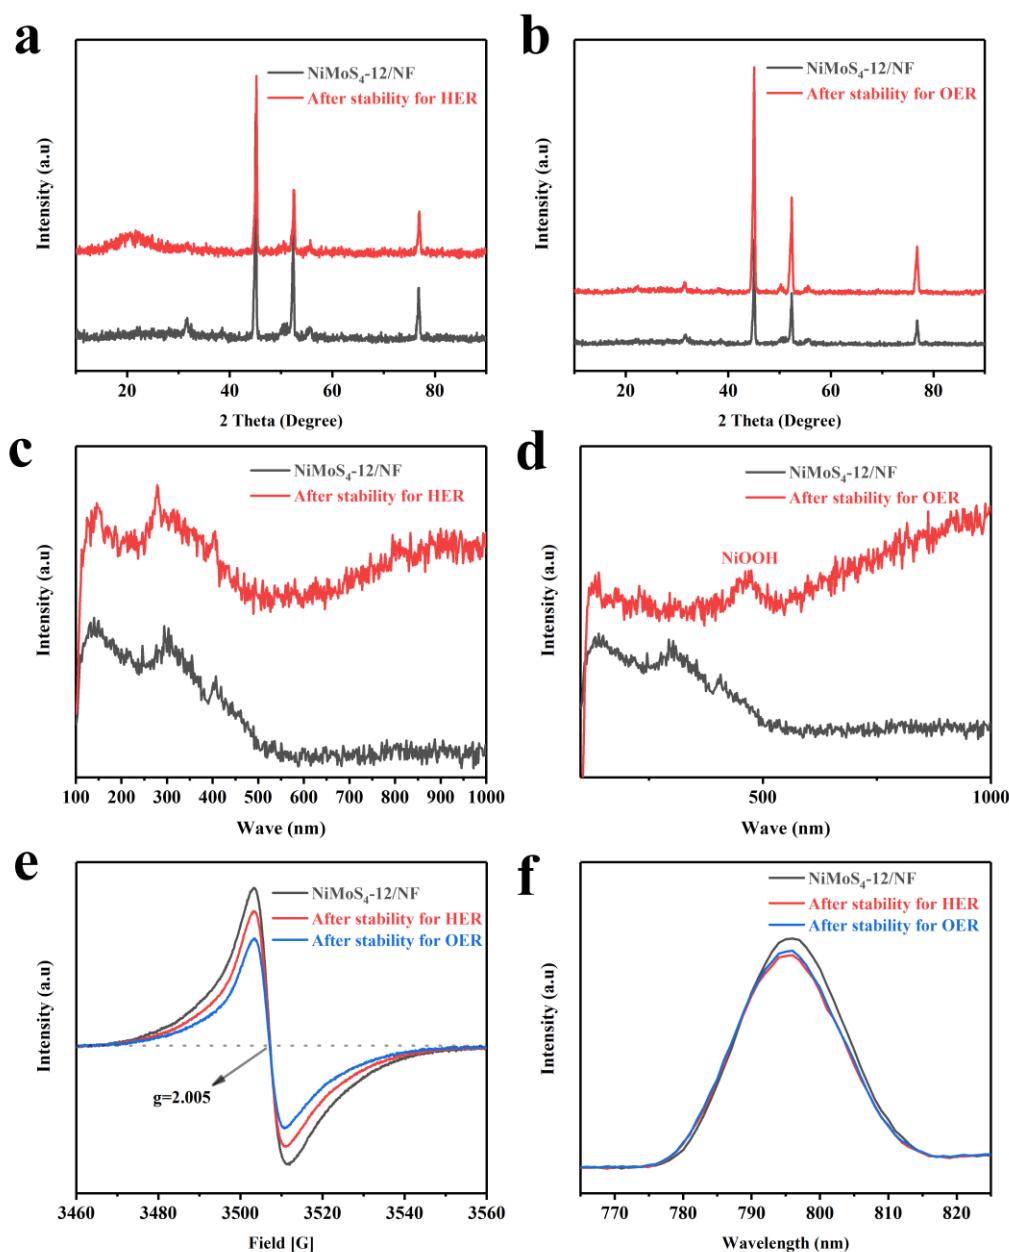

**Fig. S5.** (a) XRD patterns of NiMoS<sub>4</sub>-12/NF before and after the stability test for HER. (b) XRD patterns of NiMoS<sub>4</sub>-12/NF before and after the stability test for OER. (c) Raman spectra of NiMoS<sub>4</sub>-12/NF before and after the stability test for HER. (d) Raman spectra of NiMoS<sub>4</sub>-12/NF before and after the stability test for OER. (e) EPR spectra of NiMoS<sub>4</sub>-12/NF before and after the stability test for HER and OER. (f) PL spectra of NiMoS<sub>4</sub>-12/NF before and after the stability test for HER and OER.

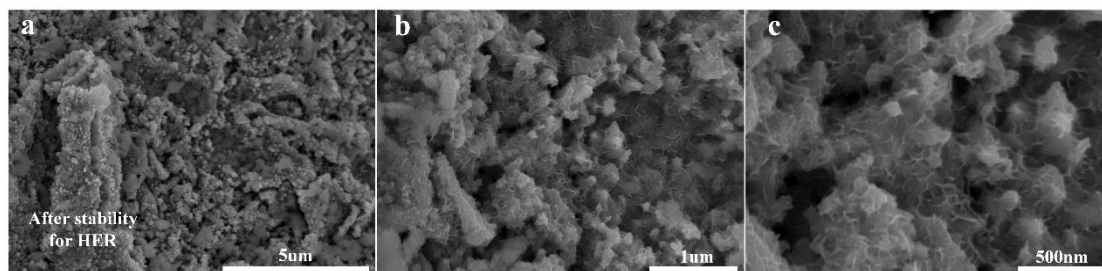

**Figure S6.** SEM images of NiMoS<sub>4</sub>-12/NF after the stability test for HER.

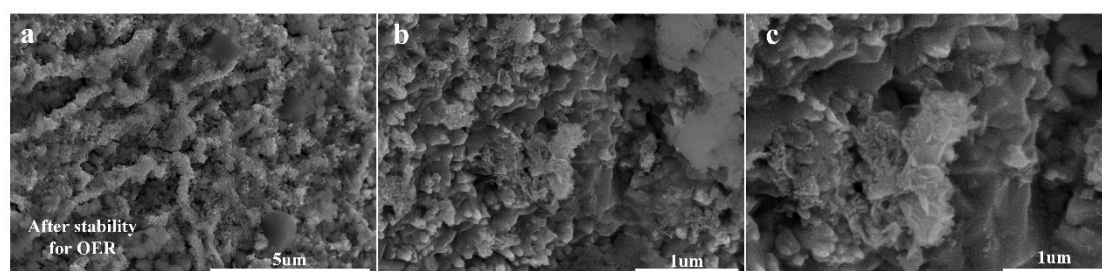

**Fig. S7.** SEM images of NiMoS<sub>4</sub>-12/NF after the stability test for OER.



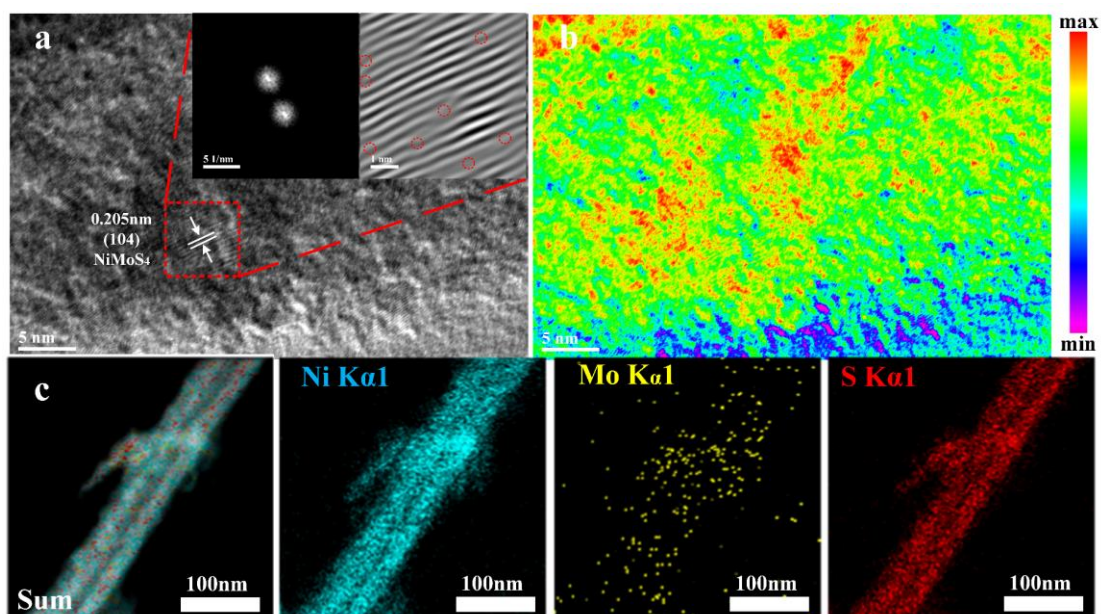

**Fig. S8.** (a) TEM images of NiMoS<sub>4</sub>-12. (b) Strain map of NiMoS<sub>4</sub>-12. FFT images of (inset of a) NiMoS<sub>4</sub>-12. (c) TEM-EDX elemental mapping of NiMoS<sub>4</sub>-12 after the stability test for HER.

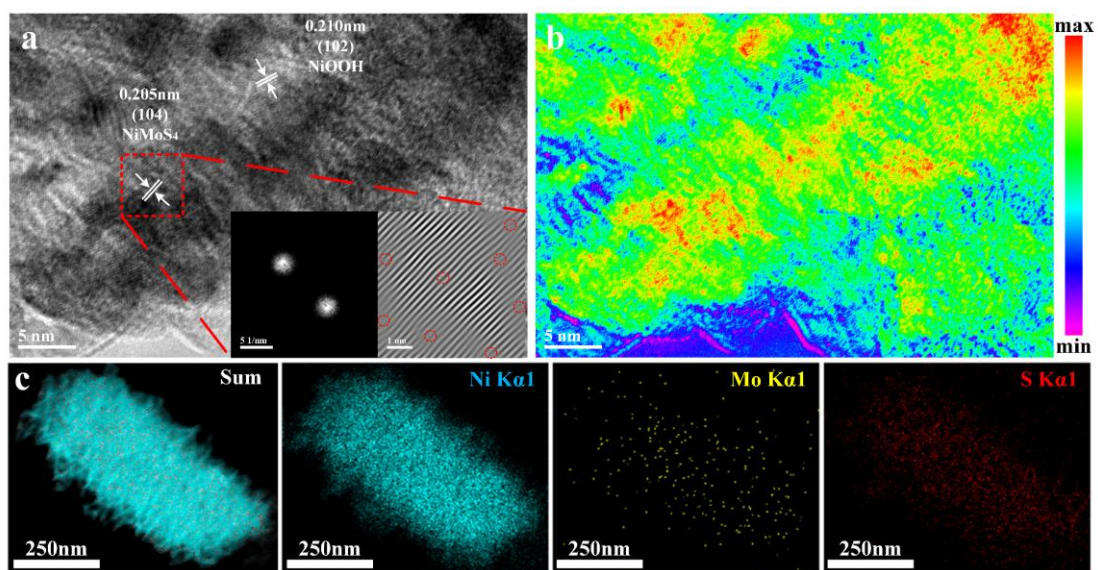

**Fig. S9.** (a) TEM images of NiMoS<sub>4</sub>-12. (b) Strain map of NiMoS<sub>4</sub>-12. FFT images of (inset of a) NiMoS<sub>4</sub>-12. (c) TEM-EDX elemental mapping of NiMoS<sub>4</sub>-12 after the stability test for OER.



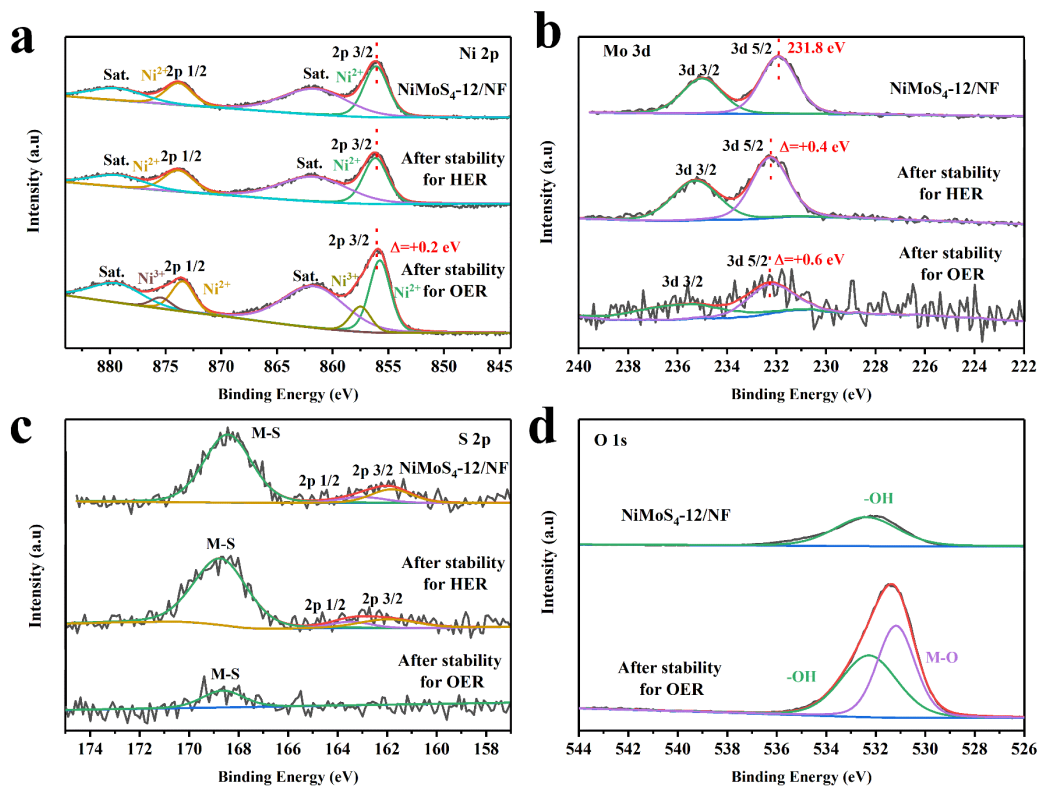

**Fig. S10.** HR-XPS spectra of (a) Ni 2p, (b) Mo 3d, and (c) S 2p of NiMoS<sub>4</sub>-12/NF before and after the stability test for HER and OER. (c) HR-XPS spectra of O1s of NiMoS<sub>4</sub>-12/NF before and after the stability test for OER.

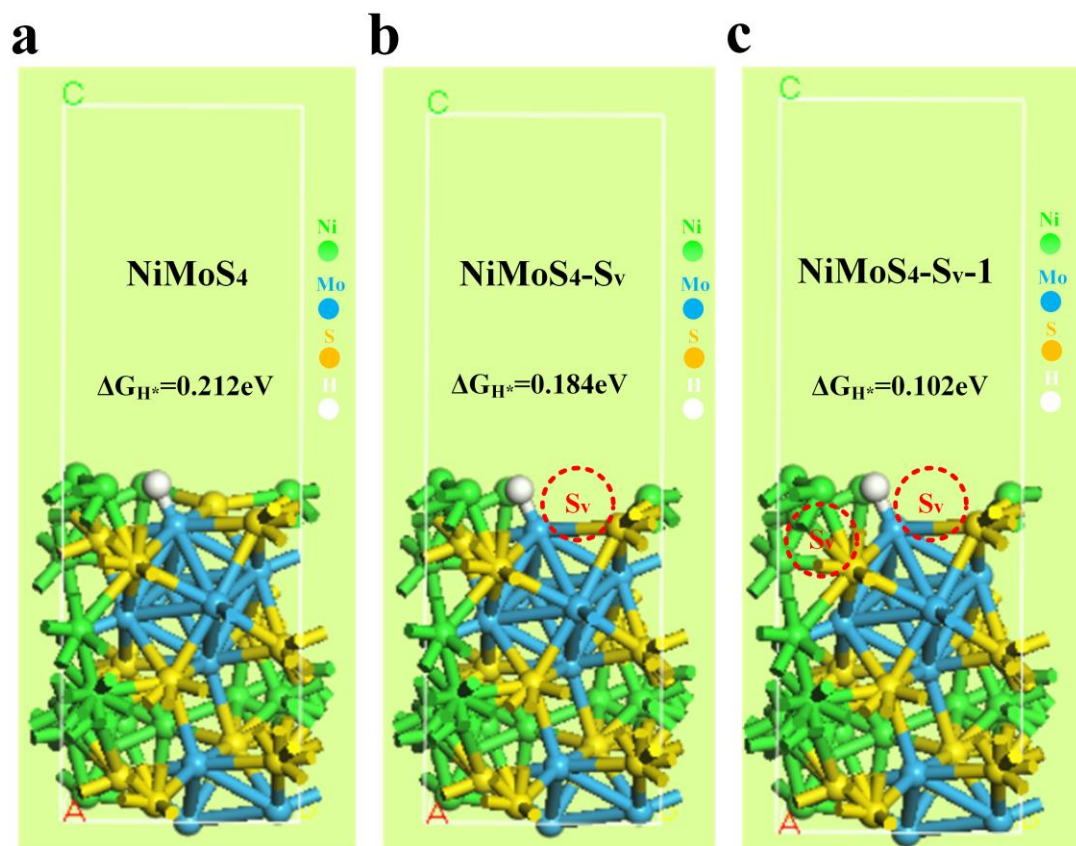

**Fig. S11.** The  $\Delta G_{H^*}$  of NiMoS<sub>4</sub>, NiMoS<sub>4</sub>-S<sub>v</sub>, and NiMoS<sub>4</sub>-S<sub>v</sub>-1 on the (104) face. The Ni, Mo, S, and H atoms are represented by Green, blue, yellow, and white spheres, respectively.

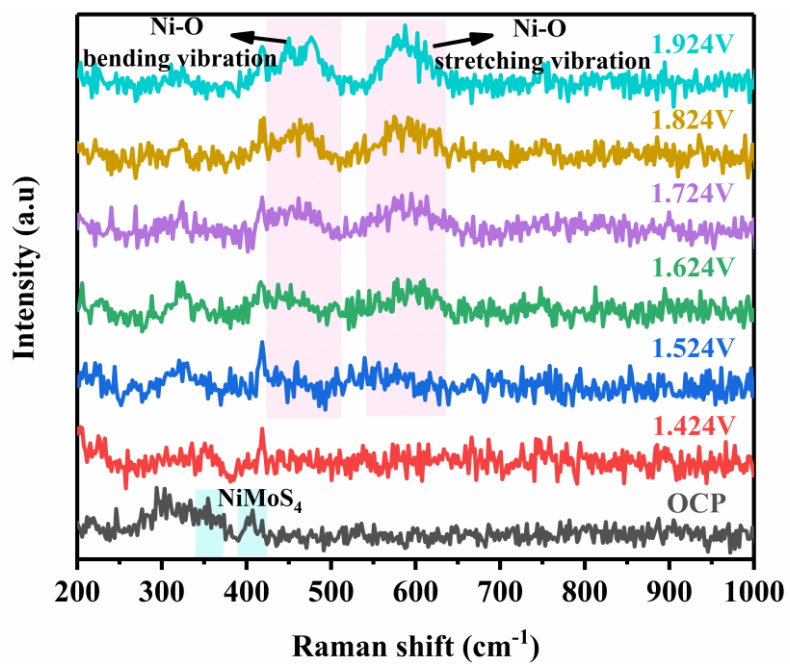

**Fig. S12.** A simplified diagram the in-situ Raman for NiMoS<sub>4</sub>-12/NF (from OCP to 1.924 V vs. RHE).

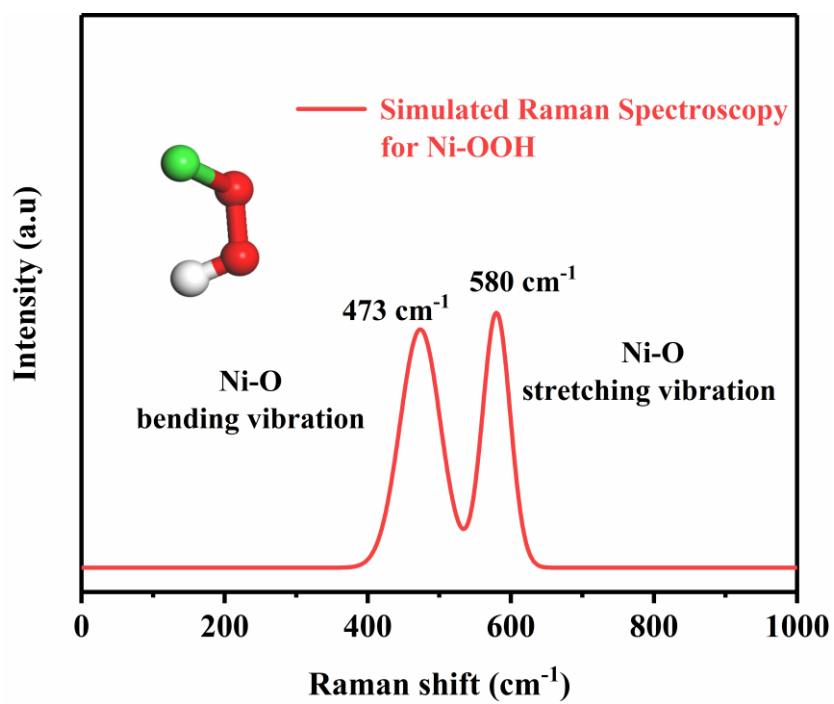

**Fig. S13.** DFT simulation calculation Raman frequency of the bending and stretching vibration modes of Ni-O belonging to Ni-OOH.

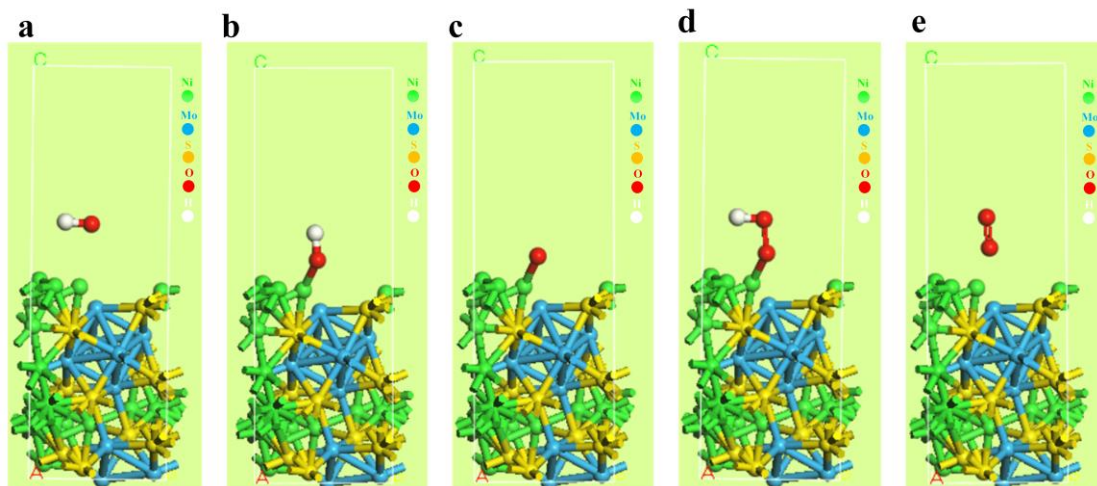

**Fig. S14.** Structures of the reaction intermediates through the OER process on NiMoS<sub>4</sub>-Sv-1 surfaces.

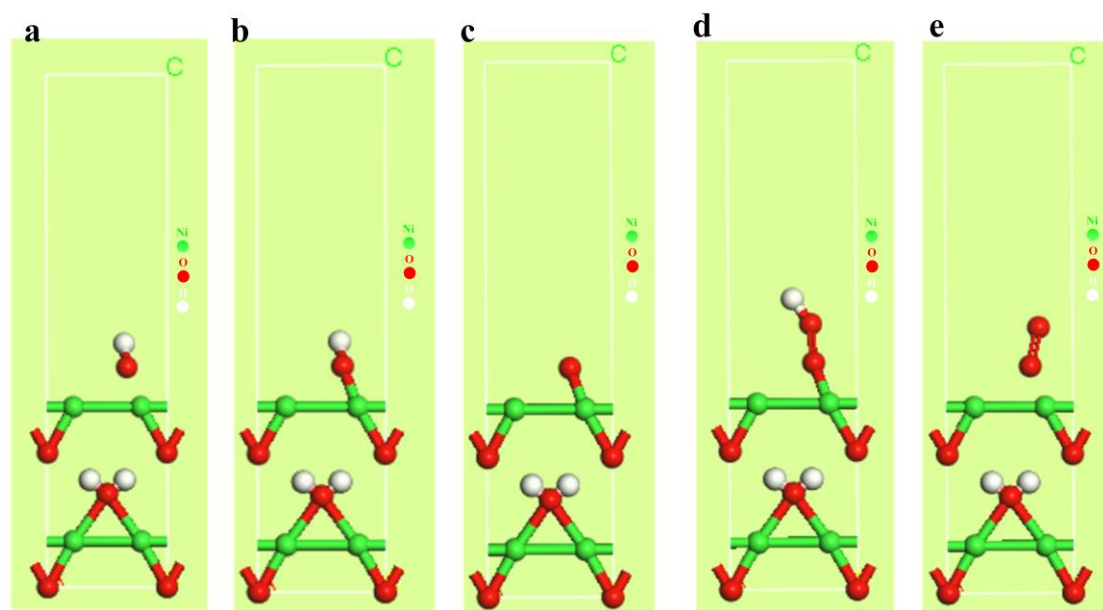

**Fig. S15.** Structures of the reaction intermediates through the OER process on Ni-OOH surfaces.

**Table S1.** Comparison of the element mass percentage and atomic percentage for Ni<sub>3</sub>S<sub>2</sub>, NiMoS<sub>4</sub>-12, NiMoS<sub>4</sub>-12 (HER for 100h), and NiMoS<sub>4</sub>-12 (OER for 100h) from the TME-EDS.

| Catalysts                      | Element | wt%   | Atomic percentage |
|--------------------------------|---------|-------|-------------------|
| Ni <sub>3</sub> S <sub>2</sub> | S       | 27.93 | 41.5              |
|                                | Ni      | 72.07 | 58.5              |
| NiMoS <sub>4</sub> -12         | S       | 42.29 | 62.97             |
|                                | Ni      | 26.33 | 21.42             |
|                                | Mo      | 31.38 | 15.61             |
| HER for 100h                   | S       | 35.66 | 55.17             |
|                                | Ni      | 35.26 | 29.8              |
|                                | Mo      | 29.08 | 15.03             |
| OER for 100h                   | O       | 1.72  | 5.21              |
|                                | S       | 33.59 | 50.89             |
|                                | Ni      | 34.72 | 28.73             |
|                                | Mo      | 29.97 | 15.17             |

**Table S2.** Comparison of electrochemical performances of HER, OER, and OWS of NiMoS<sub>4</sub>-12 with recently reported top tier metal based inorganic electrocatalysts in 1 M KOH.

| Catalysts                                              | HER              | OER              | OWS             | Ref.             |
|--------------------------------------------------------|------------------|------------------|-----------------|------------------|
|                                                        | $\eta_{10}$ (mV) | $\eta_{10}$ (mV) | $\eta_{10}$ (V) |                  |
| <b>NiMoS<sub>4</sub>-12</b>                            | <b>119</b>       | <b>273</b>       | <b>1.47</b>     | <b>This work</b> |
| MoS <sub>2</sub> -NiS <sub>2</sub> /N-doped graphene   | 172              | 370              | 1.64            | 1                |
| NiCoFeP/C                                              | 149              | 270              | 1.60            | 2                |
| Ni <sub>3</sub> S <sub>2</sub> @NGCLs/NF               | 134              | 271              | 1.55            | 3                |
| CoP@FeCoP/NC YSMPs                                     | 141              | 238              | 1.68            | 4                |
| CoSe <sub>2</sub> @MoSe                                | 183              | 309              | 1.52            | 5                |
| Carbon-incorporated NiO/Co <sub>3</sub> O <sub>4</sub> | 169.5            | 290              | 1.63            | 6                |
| Ni-Fe-P nanocubes                                      | 182              | 271              | 1.67            | 7                |
| NiCoFeP                                                | 131              | 273              | -               | 8                |
| NiFe-NC                                                | 197              | 271              | 1.67            | 9                |



## References

1. P. Kuang, M. He, H. Zou, J. Yu and K. Fan, *Applied Catalysis B: Environmental*, 2019, **254**, 15-25.
2. X. Wei, Y. Zhang, H. He, L. Peng, S. Xiao, S. Yao and P. Xiao, *Chemical Communications*, 2019, **55**, 10896-10899.
3. B. Li, Z. Li, Q. Pang and J. Z. Zhang, *Chemical Engineering Journal*, 2020, **401**, 126045.
4. J. Shi, F. Qiu, W. Yuan, M. Guo and Z.-H. Lu, *Chemical Engineering Journal*, 2021, **403**, 126312.
5. Z. Chen, W. Wang, S. Huang, P. Ning, Y. Wu, C. Gao, T.-T. Le, J. Zai, Y. Jiang, Z. Hu and X. Qian, *Nanoscale*, 2020, **12**, 326-335.
6. X. Wei, Y. Zhang, H. He, D. Gao, J. Hu, H. Peng, L. Peng, S. Xiao and P. Xiao, *Chemical Communications*, 2019, **55**, 6515-6518.
7. C. Xuan, J. Wang, W. Xia, Z. Peng, Z. Wu, W. Lei, K. Xia, H. L. Xin and D. Wang, *ACS Appl. Mater. Interfaces*, 2017, **9**, 26134-26142.
8. Y. Guo, J. Tang, Z. Wang, Y. Sugahara and Y. Yamauchi, *Small*, 2018, **14**, 1802442.
9. A. Kumar and S. Bhattacharyya, *ACS Appl. Mater. Interfaces*, 2017, **9**, 41906-41915.
